# Supplementary material
Source: PubMed Central journal article supplement (PMC4958614)
Supplement: NIHMS776214-supplement-1.pdf [file NIHMS776214-supplement-1.pdf]

## Credit Roster for the Comparison of AMD Treatments Trials Follow-Up Study

### Clinical Centers (Ordered by Number of Patients Enrolled)

**Certified Roles at Clinical Centers:** Clinic Coordinator (CC), Participating Ophthalmologist (O), Ophthalmic Photographer (OP); Optical Coherent Tomography Technician (OCT), Principal Investigator (PI), Refractionist (R), Visual Acuity Examiner (VA)

**Vitreoretinal Surgery, PA (Edina, MN):** David F. Williams, MD (PI); Steven Bennett, MD (O); Carmen Chan-Tram, COA (CC/VA/R); Holly Cheshier, CRA, COT, OCTC (OP/OCT); John Davies, MD (O); Sundeep Dev, MD (O); Julianne Enloe, CCRP, COA (CC/VA/R); Jill Johnson, MD (O); Tori Jones, COA (OCT); Robert Mittra, MD (O); Neal Oestreich, COT (CC/VA/R); Wilkin Parke III, MD (O); Polly Quiram, MD (O); Robert Ramsay, MD (O); Trenise Steele, COA (OCT); Jessica Tonsfeldt, COA (OP/OCT).

**Texas Retina Associates (Dallas, TX):** Gary Edd Fish, MD (PI); Rajiv Anand, MD (O); Sally Arceneaux (CC/VA/R); Bob Boleman (OP/OCT); David Callanan, MD (O); Deborah Chong, MD (O); Lori Coors, MD (O); Jodi Creighton, COA (CC); Karl Csaky, MD (O); Christopher Dock (OP/OCT); Karen Duignan, COT (VA/R); Dwain Fuller, MD (O); Nicholas Hesse (OP/OCT); Sandy Lash (VA/R); Wayne Solley, MD (O); Brian Swan, CRA (OP/OCT), Cristina Torres (VA/R); Robert Wang, MD (O); Patrick Williams, MD (O).

**Southeastern Retina Associates (Knoxville, TN):** Stephen L. Perkins, MD (PI); Nicholas Anderson, MD (O); Jennifer Beerbower, COA (VA); Joseph Googe, MD (O); James Miller, MD (O); Sarah Oelrich, CRA COT (OP/OCT); Kristina Oliver, COA (CC); Sarah Roberts (CC); Kathy Schultz (VA/R); Justin Walsh (VA/R); Jerry Whetstone (OP/OCT).

**Ingalls Memorial Hospital/Illinois Retina Associates (Harvey, IL):** David H. Orth, MD (PI); Linda S. Arredondo, RN (CC); Barbara J. Ciscato (CC); Joseph M. Civantos, MD (O); Celeste Figliulo (VA/R); Sohail Hasan, MD (O); Kiersten Nelson (OP/OCT); Kirk Packo, MD (O); Kourous Rezaei, MD (O).

**Retina Vitreous Consultants (Pittsburgh, PA):** Bernard H. Doft (PI); Robert Bergren, MD (O); Jennifer Chamberlain (CC); Paul Conrad, MD, PHD (O); Moryssa Grossman (OCT); Willia Ingram (CC); Keith McBroom (OP/OCT); Holly Mechling (CC); Lori Merlotti, CCRC (CC); Karl Olsen, MD (O); Pamela Rath, MD (O); Christina Schultz (VA/R); David Steinberg, CRA (OP/OCT); Avni Vyas, MD (O); Julie Walter (VA/R).

**Retina Vitreous Center, PA (New Brunswick, NJ):** Daniel B. Roth, MD (PI); Aline Diaz (VA/R); Howard Fine, MD MHSC (O); Eric Friedman, MD (O); Robin Green, RMA (CC); Stuart Green, MD (O); Bruce Keyser, MD (O); Brittney Larouch (VA/R); Amy Leviton (VA/R); Carly Norton (OP); Jonathan Prenner, MD (O); Deana Rogers (CC/OP/OCT); Alex Schlosser (OP/OCT); Elizabeth Warren (OP/OCT); Harold Wheatley, MD (O).

**West Coast Retina Medical Group, Inc. (San Francisco, CA):** H. Richard McDonald, MD (PI); Nina Ansari (VA/R); Arthur D. Fu, MD (O); Angela Gomez (CC); Sean Grout (OP/OCT); Sara Haug, MD PhD (O); Chad Indermill (OCT); Robert Johnson, MD (O); J. Michael Jumper, MD (O); Silvia Linares (VA/R); Brandon Lujan, MD (O); Meredith Persons (CC); Rosa Rodriguez (CC); Yesmin Urias (OCT); Stephen Williams, MD (O).

**Retina Northwest, P.C. (Portland, OR):** Richard F. Dreyer, MD (PI); Michele Connaughton, CRA (OP/OCT); Stephen Hobbs (VA/R/OCT); Christine Hoerner (OP/OCT); Marcia Kopfer, COT (CC/VA/R); Michael Lee, MD (O); Joe Logan, COA (OP/OCT); Colin Ma, MD (O); Amanda Milliron (VA/R); Apurva Patel, MD (O), Mark Peters, MD (O); Paul Tluczek, MD (O).

**Retinal Consultants Medical Group, Inc. (Sacramento, CA):** Joel A. Pearlman, MD, PHD (PI); Margaret Chang MD MS (O); Marta Gonzalez (OP); Erin McKenna, (CC/VA/R); Brooke Waller (OP/OCT); Robert Wendel, MD (O); Kimberlee Wong (CC/VA/R); Nyla Zabel (CC/VA/R/OCT).

**The Retina Institute (St. Louis, MO):** Daniel P. Joseph, MD (PI); Kevin Blinder, MD (O); Lynda Boyd, COT (VA/R); Gilbert Grand, MD (O); Erika Hoehn (CC); Ginny Nobel, COT (CC); Kelly Pepple (VA/R); Brooke Pulliam COA, (VA/R); Maria Stuart COA (VA/R); Matthew Thomas, MD (O); Rhonda Weeks, CCRC (CC); Jarrod Wehmeier (OP/OCT); Tim Wright (OP/OCT).

**Retinal Consultants of Arizona (Phoenix, AZ):** Pravin Dugel, MD (PI); Sandra Arenas (CC); Mark Barakat, MD (O); Crystal Brown, CMA (OCT); John Bucci (OP/OCT); Mia Chavez, COA (OP/OCT); Scheleen Dickens, (CC); Heather Dunlap (VA/R); David Goldenberg, MD (O); Karim Jamal, MD (O); Norma Jimenez (OP/OCT); Derek Kunimoto, MD (O); John Martin (OP/OCT); Rachel Mckusick (VA/R); Sachin Mehta, MD (O); Sarah Mobley (VA/R); Edward Quinlan, MD (O); Roger Weckter, COT (VA/R); Matthew Witmer, MD (O).

**The Retina Group of Washington (Chevy Chase, MD):** Daniel M. Berinstein, MD (PI); Tanya Alexander-Snowden, CRC (CC); Thomas Blondo (VA/R); Justin Davis (OP/OCT); Vanessa Denny (VA/R); Bryan Gallerson (VA/R); Richard A. Garfinkel, MD (O); Smitha Gopakumar (CC); Sarah Hanselman (VA/R), Michael M. Lai, MD, PHD (O); Alexander Melamud, MD (O); Bryan Murphy (OP/OCT); Robert Murphy, MD (O), Stacey Orenca (OP/OCT); Michael Osman, MD (O); Jennifer Phosaksee (VA/R); Steve Rauch (OP/OCT)/ Reginald Sanders, MD (O).

**Emory Eye Center (Atlanta, GA):** Baker Hubbard, MD (PI); Chris Bergstrom, MD (O); Judy Brower, COMT (CC/VA/R); Jannah Dobbs (OCT); Lindreth DuBois, MED, MMSC, CO, COMT (CC/VA/R); Matt Raeber, CRA (OP).

**Casey Eye Institute (Portland, OR):** Christina J. Flaxel, MD (PI); Steven Bailey, MD (O); Jordan Barth (OP/OCT); Shelley Hanel (CC); Chris Howell, (OCT); Jocelyn Hui (OP/OCT); Thomas Hwang, MD (O); Andreas Lauer, MD (O); Ann Lundquist, CCRP (CC/VA); Susan K. Nolte (R); Scott Pickell (VA); Dawn Ryan, CRA (OCT); Mitchell Schain (VA/R); Peter Steinkamp, MS (OP/OCT).

**California Retina Consultants (Santa Barbara, CA):** Robert L. Avery, MD (PI); Alessandro Castellarin, MD (O); Sarah Fishbein (VA/R); Matthew Giust (OP); Michelle Hanna (CC/VA/R/OCT); Dante Pieramici, MD (O); Melvin Rabena (CC); Aimee Walker (OP).

**Ophthalmic Consultants of Boston (Boston, MA):** Trexler M. Topping, MD (PI); Mary Doherty (CC); Dennis Donovan (OCT); Margaret Graham (OP/OCT); Cullen Jones (OP/OCT); Jennifer Stone (VA/R);

**Charlotte Eye, Ear, Nose & Throat Associates/Southeast Clinical Research (Charlotte, NC):** Andrew N. Antoszyk, MD (PI); Uma Balasubramaniam, COA (OP/OCT); Loraine Clark, COA (OP/OCT); Sarah Ennis, CCRC (VA/R); Jenna Herby, CCRC (CC); Angie Karow, CCRP (VA/R); Donna McClain, COA (OP); Michael McQwen, CRA (OP); Angela Price, MPH, CCRC (CC).

**Mayo Clinic (Rochester, MN):** Sophie J. Bakri, MD (PI); Betsy Baker (CC); Jean Burrington, COA (VA/R); Gillian Currie (CC); Shannon Goddard, COA (OP/OCT); Joan Overend (VA/R); Diane Vogen (CC).

**Dean A. McGee Eye Institute (Oklahoma City, OK):** Reagan H. Bradford Jr, MD (PI); Shannon Almeida, COA (CC/VA/R); Russ Burriss (OP/OCT); Vanessa Drummond (VA/R); Stephen Fransen, MD (O); Ronald Kingsley, MD (O); Lauren Ukelya (CC).

**Tennessee Retina, P.C. (Nashville, TN):** Carl C. Awh, MD (PI); Alecia Camp, CRA (OP/OCT); Tara Farmer (OP/OCT); Sarah Hines, COA (CC); Gina Smith, COA (OCT); Katlyne Thompson (VA/R); Susan Wiser, RN, CRC (CC); Julia Wray, COA (OP/OCT).

**Retina Associates Southwest, P.C. (Tucson, AZ):** April E. Harris, MD (PI); Cory Arndt (VA/R/OCT); Denise Cota (VA); Cameron Javid, MD (O); Carly Jensen (CC); Erica Montoya, (VA/R); Jenny Ortiz (CC); Egbert Saavedra, MD (O); Margarita Salcedo (VA); Mark Walsh, MD (O), Dana Watts (VA/R); Larry Wilson (OP).

**Midwest Eye Institute (Indianapolis, IN):** Thomas A. Ciulla, MD (PI); Charlotte Harris, COA (OP); Cindi Hood (OCT); Ingrid Kerr, COA (VA/R); Raj Maturi, MD (O); Shyla Robson (OCT); Bethany Sink, COA (CC); Tom Steele (OP).

**National Ophthalmic Research Institute (Fort Myers, FL):** Joseph P. Walker, MD (PI); Natalie Crawford (CC); A. Tom Ghuman, MD (O); Linda Greenhoe (CC); Cheryl Kiesel, CCRC (CC); Ray Kiesel (OP); Eileen Knips, RN, CCRC, CRA (OP/OCT); Anita Leslie (VA/R); Crystal Peters, CCRC (CC); Paul Raskauskas, MD (O); Ashish Sharma, MD (O); Glenn Wing, MD (O).

**University of California-Davis Medical Center (Sacramento, CA):** Susanna S. Park, MD, PHD (PI); Karishma Chandra (OCT); Sashi Deo, CRA (OP/OCT); Katrina Imson (VA/R); Ellen Redenbo, CRA (OP/OCT); Cindy Wallace, CCRP (CC).

**University of Wisconsin Madison (Madison, WI):** Suresh R. Chandra, MD (PI); Kristine A. Dietzman, CCRC (CC/VA/R); Justin Gottlieb, MD (O); Denise Krolnik (OP/OCT); Mihai Mititelu, MD PHD (O); John Peterson, CRA (OP/OCT); Sandra Reed (OP/OCT); Chris Smith, COA (VA/R), Angela Wealti (VA/R).

**University of Louisville School of Medicine, KY (Louisville, KY):** Charles C. Barr, MD (PI); Angela Anderson (VA/R/OCT); Michelle Bottorff, COA (CC/OCT); Lisa Wheeler, COT (OCT).

**Colorado Retina Associates (Denver, CO):** John Zilis, MD (PI); Katherine Brock (C/VA/R); Rachel Gerle (CC/VA/R); Mimi Liu, MD (O); Kelly West, CRA (OP/OCT).

**Retina Associates of Kentucky (Lexington, KY):** Thomas W. Stone, MD (PI); Michelle Buck, COT, (VA/R/OP/OCT); Diana Holcomb (CC/VA/R); Rick Isernhagen, MD (O); John Kitchens, MD (O); Ed Slade, CRA, COA (OP/OCT); William Wood, MD (O).

**University of Iowa Hospitals & Clinics (Iowa City, IA):** James C. Folk, MD (PI); Douglas Critser, CRA (OP/OCT); Stephen Russell, MD (O); Christine Sinkey, CCRC (CC); Heather Stockman (VA/R); Barbara Taylor, CCRC (VA/R); Jean Walshire (CC).

**Retina Specialists (Towson, MD):** John T. Thompson, MD (PI); Maryanth Constantine (CC); Lisa Hunter (OCT); Robin Mitchell (VA/R); Leslie Russel, CRA (OP).

**Retina Consultants of Houston (Houston, TX):** David M. Brown, MD (PI); Matthew Benz, MD (O); Belinda Almanza (VA/R); Eric Chen, MD (O); Richard Fish, MD (O); Nikki Franks (CC); Debbie Gillaspia (CC); Eric Kegley, CRA, COA (OP/OCT); James Major, MD (O); Beau Richter (OCT); Tressa Royce (VA/R); Amy Scheffler, MD (O); Veronica Sneed, COA (VA/R); Tien Wong, MD (O); Charles Wykoff, MD (O).

**Palmetto Retina Center (West Columbia, SC):** John Wells, MD (PI); Peggy Miller (CC); Tiffany Ogbuewu (VA/R) Ronald Petty (OP/OCT); Courtney Sease (VA/R) Robbin Spivey (OP/OCT).

**Massachusetts Eye and Ear Infirmary/Harvard Vanguard Medical Associates (Boston, MA):**

Ivana Kim, MD (PI); Christopher Andreoli, MD (O); Ursula Bator, BSN, OD (VA/R); Sarah Brett (OP); Matthew Dirocco (OP); Claudia Evans, OD (VA/R); Flor Flores (CC/VA); Joyce Galonsky, RN (CC); Marcia Grillo (OCT); Troy Kieser, CCRP (CC/VA/R); Alexis Laverde (OCT); Kylie Madigan (OP/OCT); Kate Palitsch, COA (OP/OCT); Demetrios Vavvas, MD, PHD (O).

**Wills Eye Institute/ Mid Atlantic Retina (Philadelphia, PA):** Richard Kaiser, MD (PI); Stacy Boxley (CC); Gary Brown, MD (O); Allen Chiang, MD (O); Stefanie DeSantis (OP/OCT); Mitchell Fineman, MD (O); Michele Formoso (CC); Sunir Garg, MD (O); Elaine Gonzales (OP/OCT); Lisa Grande (VA/R); Allen Ho, MD (O); Jason Hsu, MD (O); Jessica Jordan (CC); Elaine Liebenbaum (OP); Joseph Maguire, MD (O); Sonia Mehta, MD (O); Carl Regillo, MD (O); Marc Spirn, MD (O); James Vander, MD (O).

**Ohio State University Eye Physicians & Surgeons-Retina Division (Dublin, OH):** Frederick H. Davidorf, MD (PI); Colleen Cebulla, MD PHD (O); Susie Chang, MD (O); PJ Fish (OP/OCT); Alan Letson, MD (O); Matthew Ohr, MD (O); Jeri Perry, COT (VA/R); Jill A. Salerno, COA (CC); Scott Savage (OP/OCT); Christina Stetson (CC); Michael Wells, MD (O).

**Retina Associates of Cleveland (Beachwood, OH):** Lawrence J. Singerman, MD (PI); John DuBois (OP/OCT); Gregg Greanoff, CRA (OP/OCT); Dianne Himmelman, RN, CCRC (CC); Mary Ilc, COT (VA/R); Vivian Tanner, COT, CCRP (VA/R).

**Retina and Vitreous of Texas (Houston, TX):** Joseph Khawly, MD, FACS (PI); Diana Abdelgani, COT (CC); Colin Blank (OP/OCT); Debbie Fredrickson, COA (VA/R); Desiree Lopez (OP/OCT); Donald Lowd (OP/OCT); Pam Miller (CC); Arthur Willis, MD (O).

**Elman Retina Group, P.A. (Baltimore, MD):** Michael Elman, MD (PI); Theresa Cain (OP/OCT); Teresa Coffey, COA (VA/R); Henry Leder, MD (O); JoAnn Starr (CC).

**University of North Carolina at Chapel Hill (Chapel Hill, NC):** Travis A. Meredith, MD (PI); Cassandra J. Barnhart, MPH (CC/VA/R); Debra Cantrell, COA (OP/OCT); Odette Houghton, MD (O).

## Resource Centers

**Chairman's Office (Cleveland Clinic, Cleveland, OH):** Daniel F. Martin, MD (Chair); Stuart L. Fine, MD (Vice-Chair; University of Colorado, Denver, CO)

**Coordinating Center (University of Pennsylvania, Philadelphia, PA):** Maureen G. Maguire, PhD (PI); Mary Brightwell-Arnold, SCP (Systems Analyst); Sandra Harkins (Staff Assistant); Jiayan Huang, MS (Biostatistician); Kathy McWilliams, CCRP (Protocol Monitor); Ellen Peskin, MA, CCRP (Project Director); Wei Pan, MS (Biostatistician); Maxwell Pistilli, MS, MEd (Biostatistician); Susan Ryan (Financial Administrator); James Shaffer MS (Biostatistician); Gui-Shuang Ying, PhD (Senior Biostatistician).

**OCT Reading Center (Duke University, Durham, NC):**

Glenn J. Jaffe, MD (PI); Cynthia A Toth (Co-investigator); Michelle Brinkley (Project Manager Assistant); Russell Burns (OCT Image Reader); John Choong (OCT Image Reader); Emily DuBois (Data entry); Ryan Ebersohl (OCT Image Reader); Lindsay Gaskins (Project Manager Assistant); Ana Graneiro (Project Manager Assistant); Katie Hall (Project Manager); Cindy Heydary (OCT Image Reader); Lindsey Heydary (Project Manager Assistant); Alain Humblet (OCT Image Reader); Murad Maksumov (OCT Image Reader); Keifer McGugan (Project Manager Assistant); Amanda Robertson

(Project Manager); Kelly Shields (OCT Image Reader); Cindy Skalak (OCT Image Reader); Katrina Winter (OCT Image Reader); Ellen Young (Senior Project Manager)

**Fundus Photograph Reading Center (University of Pennsylvania, Philadelphia, PA):** Juan E. Grunwald, MD (PI); Ebenezer Daniel, MBBS, MS, MPH, PhD (Director); E. Revell Martin (Reader); Candace Parker (Reader); Claressa Whearry (Data Coordinator).

**National Eye Institute, National Institutes of Health:** Maryann Redford, DDS, MPH (Program Officer).

### **Committees**

**Operations Committee:** Daniel F. Martin, MD (chair); Ebenezer Daniel, MBBS, MS, MPH; Frederick L. Ferris III, MD; Stuart L. Fine, MD; Juan E. Grunwald, MD; Glenn Jaffe, MD; Maureen G. Maguire, PhD; Ellen Peskin, MA, CCRP; Maryann Redford, DDS, MPH; Cynthia Toth, MD.; Gui-shuang Ying, PhD.

**Clinic Monitoring Committee:** Ellen Peskin, MA, CCRP (chair); Mary Brightwell-Arnold, SCP; Maureen G. Maguire, PhD; Kathy McWilliams, CCRP;

**Data Monitoring Oversight Committee:** Lawrence M. Friedman, MD (chair); Barbara Blodi, MD; Mark W. Johnson, MD; Anne Lindblad, PhD.
