# Supplementary material
Source: PubMed Central journal article supplement (PMC4958614)
Supplement: NIHMS776214-supplement-2.pdf [file NIHMS776214-supplement-2.pdf]

Table 4. Vision and Morphological Outcomes by Dosing Regimen Assigned in the Clinical Trial

| Outcome                                                                    | Dosing Regimen Assigned in the Clinical Trial |                  |                            | P-value |
|----------------------------------------------------------------------------|-----------------------------------------------|------------------|----------------------------|---------|
|                                                                            | 2 Years Monthly (N=164)                       | Switched (N=157) | 2 Years As Needed (N= 326) |         |
| Visual acuity score, letters                                               |                                               |                  |                            |         |
| Snellen equivalent, no. (%)                                                |                                               |                  |                            |         |
| 83-97, 20/12-20                                                            | 15 ( 9.1)                                     | 18 (11.5)        | 27 ( 8.3)                  |         |
| 68-82, 20/25-40                                                            | 67 (40.9)                                     | 62 (39.5)        | 132 (40.5)                 |         |
| 53-67, 20/50-80                                                            | 40 (24.4)                                     | 27 (17.2)        | 65 (19.9)                  |         |
| 38-52, 20/100-160                                                          | 15 ( 9.1)                                     | 17 (10.8)        | 33 (10.1)                  |         |
| 37-18, 20/200-400                                                          | 17 (10.4)                                     | 16 (10.2)        | 40 (12.3)                  |         |
| ≤17, ≤20/400                                                               | 10 ( 6.1)                                     | 17 (10.8)        | 29 ( 8.9)                  |         |
| Mean letters (SD)                                                          | 60.5 (22.4)                                   | 58.6 (26.3)      | 58.2 (23.9)                | 0.60    |
| Change in visual acuity score, from baseline, letters, no. (%)             |                                               |                  |                            |         |
| ≥15 increase                                                               | 33 (20.1)                                     | 31 (19.7)        | 50 (15.3)                  |         |
| 5-14 increase                                                              | 47 (28.7)                                     | 33 (21.0)        | 76 (23.3)                  |         |
| ≤ 4 change                                                                 | 29 (17.7)                                     | 37 (23.6)        | 76 (23.3)                  |         |
| 5-14 decrease                                                              | 23 (14.0)                                     | 17 (10.8)        | 42 (12.9)                  |         |
| 15-29 decrease                                                             | 17 (10.4)                                     | 13 ( 8.3)        | 41 (12.6)                  |         |
| ≥30 decrease                                                               | 15 ( 9.1)                                     | 26 (16.6)        | 41 (12.6)                  |         |
| Mean (SD)                                                                  | -0.8 (21.2)                                   | -4.2 (24.9)      | -4.2 (21.5)                | 0.24    |
| Change in visual acuity score, from 2 years, letters, no. (%) <sup>§</sup> |                                               |                  |                            |         |
| ≥15 increase                                                               | 7 ( 4.3)                                      | 5 ( 3.2)         | 5 ( 1.5)                   |         |
| 5-14 increase                                                              | 18 (11.1)                                     | 17 (10.9)        | 25 ( 7.7)                  |         |
| ≤ 4 change                                                                 | 51 (31.5)                                     | 53 (34.2)        | 111 (34.0)                 |         |
| 5-14 decrease                                                              | 34 (21.0)                                     | 40 (25.8)        | 93 (28.6)                  |         |
| 15-29 decrease                                                             | 25 (15.4)                                     | 20 (12.9)        | 56 (17.2)                  |         |
| ≥30 decrease                                                               | 27 (16.7)                                     | 20 (12.9)        | 36 (11.0)                  |         |
| Mean (SD)                                                                  | -11.4 (19.6)                                  | -9.6 (18.8)      | -11.0 (18.6)               | 0.67    |
| Total thickness at fovea, μm                                               | (N=142)                                       | (N=139)          | (N=274)                    |         |
| Mean (SD)*                                                                 | 273 (163)                                     | 291 (164)        | 275 (157)                  | 0.56    |
| Mean Change(SD) from 2 years***                                            | -11 (148)                                     | -31 (122)        | -19 (129)                  | 0.46    |
| Fluid on optical coherence tomography                                      |                                               |                  |                            |         |
| None                                                                       | 28 (19.9)                                     | 26 (18.7)        | 40 (14.7)                  | 0.35    |
| Present                                                                    | 113 (80.1)                                    | 113 (81.3)       | 232 (85.3)                 |         |
| Unknown/missing                                                            | 1                                             | 0                | 2                          |         |
| Dye leakage on angiogram                                                   | (N**=134/119)                                 | (N**=131/120)    | (N**=262/228)              |         |
| None                                                                       | 89 (76.1)                                     | 91 (77.8)        | 162 (74.0)                 | 0.73    |
| Present                                                                    | 28 (23.9)                                     | 26 (22.2)        | 57 (26.0)                  |         |
| Unknown/missing                                                            | 17                                            | 14               | 43                         |         |
| Area of lesion, mm <sup>2</sup>                                            |                                               |                  |                            |         |
| Mean (SD) <sup>†</sup>                                                     | 13.9 (11.7)                                   | 12.2 (11.7)      | 12.7 (11.1)                | 0.53    |
| Mean Change (SD) from 2 years <sup>‡‡</sup>                                | 5.4 (10.1)                                    | 4.3 (7.7)        | 4.9 (8.6)                  | 0.63    |
| Geographic atrophy±, no. (%)                                               |                                               |                  |                            |         |
| None                                                                       | 69 (53.1)                                     | 80 (62.5)        | 153 (59.5)                 | 0.60    |
| Non-foveal                                                                 | 38 (29.2)                                     | 29 (22.7)        | 43 (16.7)                  |         |
| Foveal                                                                     | 23 (17.7)                                     | 19 (14.8)        | 61 (23.7)                  |         |
| Unknown/missing                                                            | 4                                             | 3                | 5                          |         |

§4 Year 2 visual acuity scores missing; 2 in Monthly and 2 in Switched group

\*3 missing in total thickness at Year 5, 1 in Switched and 2 in PRN group

\*\* Number with color photographs/fluorescein angiograms

\*\*\*8 missing in change of total thickness from Year 2, 2 in Monthly, 3 in Switched, and 3 in PRN group

‡34 with lesion area ungradable at Year 5; 10 in Monthly, 6 in Switched, and 18 in PRN group

‡‡ 53 with missing in change of area of lesion due to ungradable images at Year 2 or Year 5, 18 in Monthly, 9 in Switched, and 26 in PRN group
