# Supplementary material
Source: PubMed Central journal article supplement (PMC4958614)
Supplement: NIHMS776214-supplement-3.pdf [file NIHMS776214-supplement-3.pdf]

Table 6. Serious Medical Events between the Year 2 and the Follow-up Study Visit by Dosing Regimen Assigned in the Clinical Trial

| Serious Medical Event                                       | Dosing Regimen Assigned in the Clinical Trial |        |                  |        |                           |        | P <sup>§</sup> |
|-------------------------------------------------------------|-----------------------------------------------|--------|------------------|--------|---------------------------|--------|----------------|
|                                                             | 2 Years Monthly (N=284)                       |        | Switched (N=260) |        | 2 Years As Needed (N=546) |        |                |
|                                                             | n                                             | (%)    | n                | (%)    | n                         | (%)    |                |
| Death-all causes                                            | 58                                            | (20.4) | 47               | (18.1) | 98                        | (17.9) | 0.66           |
| Arteriothrombotic events                                    | 19                                            | (6.7)  | 13               | (5.0)  | 34                        | (6.2)  | 0.71           |
| Venous thrombotic events                                    | 2                                             | (0.7)  | 1                | (0.4)  | 6                         | (1.1)  | 0.69           |
| Hypertension                                                | 9                                             | (3.2)  | 9                | (3.5)  | 9                         | (1.6)  | 0.18           |
| One or more serious medical events                          | 141                                           | (49.6) | 138              | (53.1) | 254                       | (46.5) | 0.21           |
| Previously associated with anti-VEGF treatment <sup>‡</sup> | 51                                            | (18.0) | 37               | (14.2) | 89                        | (16.3) | 0.50           |
| MedDRA <sup>†</sup> system organ class**                    |                                               |        |                  |        |                           |        |                |
| Cardiac disorders                                           | 34                                            | (12.0) | 25               | (9.6)  | 61                        | (11.2) | 0.68           |
| Infections                                                  | 19                                            | (6.7)  | 21               | (8.1)  | 35                        | (6.4)  | 0.67           |
| Nervous system disorders                                    | 21                                            | (7.4)  | 21               | (8.1)  | 40                        | (7.3)  | 0.92           |
| Injury and procedural complications                         | 10                                            | (3.5)  | 21               | (8.1)  | 26                        | (4.8)  | 0.054          |
| Neoplasms benign and malignant                              | 30                                            | (10.6) | 23               | (8.8)  | 44                        | (8.1)  | 0.49           |
| Gastrointestinal disorders                                  | 11                                            | (3.9)  | 10               | (3.8)  | 15                        | (2.7)  | 0.53           |

<sup>§</sup>Fisher's exact test

<sup>‡</sup> Arteriothrombotic events, systemic hemorrhage, congestive heart failure, venous thrombotic events, hypertension, vascular death

<sup>†</sup>Medical Dictionary for Regulatory Activities
